# Supplementary material for: The potential of serum elabela levels as a marker of diabetic retinopathy: results from a pilot cross-sectional study
Source: PeerJ. 2025 Jan 8;13:e18841. doi: 10.7717/peerj.18841 (PMC11724653; doi:10.7717/peerj.18841)
Supplement: Supplemental Information 1 [file peerj-13-18841-s001.xlsx]

## Sheet: Sheet1
group	age	gender	BMI	DM duration(year)	elabela pg/mL	HbA1C
non-DR	62	Female	37.3	1	201.19	7.3
non-DR	59	Female	35.2	2	163.13	6.7
non-DR	63	Female	35.4	15	151.35	9.7
non-DR	52	Male	25.8	0.3	141.61	5.8
non-DR	74	Male	31.1	25	210.16	7.6
non-DR	72	Male	29.4	6	217	12.2
non-DR	69	Female	29.4	2	188.83	10.7
non-DR	72	Male	29.4	6	95.94	12.2
non-DR	71	Male	31.8	21	268.36	9
non-DR	70	Male	24.9	20	232.73	8.7
non-DR	69	Female	30	10	551.77
non-DR	77	Male	29.4	0.1	152.57	6.5
non-DR	71	Male	28.1	4	107.8	9.4
non-DR	52	Female	29.3	2	217	5.7
non-DR	65	Female	29.1	2	217	9.7
non-DR	63	Female	24.2	5	340.29	5.1
non-DR	52	Female	29.3	0.1	217	6.5
non-DR	73	Female	29.4	10	279.97	11.1
non-DR	57	Female	29.3	6	173.04	5.7
non-DR	67	Female	22	5	217	6
NPDR	66	Male	24.9	7	161.24	12.8
NPDR	67	Female	29.4	10	398.51	10.3
NPDR	69	Male	28.4	8	282.51	9
NPDR	68	Female	24.6	10	171.31	10.8
NPDR	61	Male	27.3	5	204.73	7.8
NPDR	55	Male	29.3	6	134.23	12.6
NPDR	72	Female	29.3	5	491.5	10.5
NPDR	63	Female	33.2	10	155.16	8.4
NPDR	79	Female	29.4	4	221	7.3
NPDR	79	Female	38.6	15	221	14.5
NPDR	70	Female	36.7	20	214.15	9.4
NPDR	67	Male	26	15	98.57	8.6
NPDR	65	Female	31.2	10	221	9.6
NPDR	65	Female	31.2	0.2	158.86	11.9
NPDR	60	Male	28.3	8	229.69	7.1
NPDR	73	Male	29.6	5	176.68
NPDR	61	Male	26.2	5	254.81	7.6
NPDR	62	Female	33.2	5	293.93	10.4
NPDR	69	Female	34.9	25	117.7	8.4
NPDR	67	Female	53.9	5	228.55	7.6
PDR	54	Male	35.6		197.04	5.2
PDR	74	Male	26.1	8	290.26	8.2
PDR	68	Male	25.4	15	202.13	9.4
PDR	80	Female	29.4	20	578.21	9.8
PDR	72	Female	27.5	20	302	9.8
PDR	54	Male	29.3	15	137.99	12.6
PDR	58	Female	31.3	20	177.29	12
PDR	65	Male	26.2	15	463.59	7.8
PDR	66	Female	27.5	3	616.25	6.9
PDR	71	Male	32.4	20	152.62	9.5
PDR	53	Male	23.9	10	267.13	11.8
PDR	52	Female	36.4	22	110.64	8.5
PDR	67	Female	22	20	277.58	7.3
PDR	79	Female	25.4	15	435.6	8.9
PDR	59	Male	27.7	15	306.5	7.8
PDR	66	Female	27.5	10	155.62	9.2
PDR	52	Female	25	8	296.54	12.2
PDR	79	Female	27.5	20	275	9.7
PDR	61	Female	22	10	503.03	8.4
PDR	73	Male	29.3	10	302	8
control	61	Male	31.8		245.69
control	56	Female	29.4		167.99
control	78	Female	21.5		143.51
control	68	Male	22.3		216
control	73	Male	29.3		216
control	78	Male	23.5		200.83
control	61	Female	34.9		190.25
control	60	Female	35.2		326.05
control	67	Female	30.8		178.55
control	64	Female	35.6		283.5
control	66	Female	31.2		216
control	64	Male	23.9		359.69
control	59	Female	29.4		216
control	61	Male	32.7		227.92
control	56	Male	22.5		261.13
control	70	Female	32.6		189.57
control	76	Female	33.3		139.72
control	79	Female	25.7		167.24
control	65	Male	23.1		139.43
control	51	Female	25.4		244.78
